# Supplementary material
Source: publisher site journal article supplement (https://www.dovepress.com/article/401737)
Supplement: Supplementary file 1 [file get_supplementary_file.php]

**Supplementary data**

**Table S1.** Concordance of relapse identified by the gold standard and algorithm 1

(pre-specified) in the development cohort (n = 250)

|  |  | Relapse by gold standard | | |
| --- | --- | --- | --- | --- |
| Yes | No | Total |
| Relapse by algorithm | Yes | 50 | 18 | 68 |
| No | 1 | 181 | 182 |
| Total | 51 | 199 | 250 |

**Indicator 1**: pathology codes: SNOMED combinations, 30 days **Indicator 2**: procedure codes: radiotherapy and cytostatic therapy, 30 days **Indicator 3**: diagnosis codes: testicular cancer relapse and metastasis codes, 30 days **Indicator 4**: diagnosis codes: distant metastasis codes, 30 days

**Table S2.** Concordance of relapse identified by the gold standard and algorithm 2 in the development cohort (n = 250)

|  |  | Relapse by gold standard | | |
| --- | --- | --- | --- | --- |
| Yes | No | Total |
| Relapse by algorithm | Yes | 50 | 16 | 66 |
| No | 1 | 183 | 184 |
| Total | 51 | 199 | 250 |

**Indicator 1**: pathology codes: SNOMED combinations, 30 days **Indicator 2**: procedure codes: radiotherapy and cytostatic therapy, 30 days **Indicator 3**: diagnosis codes: testicular cancer relapse and metastasis codes, 30 days

**Table S3.** Concordance of relapse identified by the gold standard and algorithm 3 in the development cohort (n = 250)

|  |  | Relapse by gold standard | | |
| --- | --- | --- | --- | --- |
| Yes | No | Total |
| Relapse by algorithm | Yes | 50 | 16 | 66 |
| No | 1 | 183 | 184 |
| Total | 51 | 199 | 250 |

**Indicator 1**: pathology codes: SNOMED combinations, 30 days **Indicator 2**: procedure codes: radiotherapy and cytostatic therapy, 30 days

**Table S4.** Concordance of relapse identified by the gold standard and algorithm 4 in the development cohort (n = 250)

|  |  | Relapse by gold standard | | |
| --- | --- | --- | --- | --- |
| Yes | No | Total |
| Relapse by algorithm | Yes | 50 | 9 | 59 |
| No | 1 | 190 | 191 |
| Total | 51 | 199 | 250 |

**Indicator 1**: pathology codes: SNOMED combinations, 30 days **Indicator 2a**: procedure codes: radiotherapy 60 days, cytostatic therapy 30 days

**Table S5.** Concordance of relapse identified by the gold standard and algorithm 5

(final algorithm) in the development cohort (n = 250)

|  |  | Relapse by gold standard | | |
| --- | --- | --- | --- | --- |
| Yes | No | Total |
| Relapse by algorithm | Yes | 49 | 3 | 52 |
| No | 2 | 196 | 198 |
| Total | 51 | 199 | 250 |

**Indicator 1**: pathology codes: SNOMED combinations, 30 days **Indicator 2b**: procedure codes in combination with testicular cancer diagnosis code: radiotherapy

60 days, cytostatic therapy 30 days
